# Supplementary material for: Halogen bonded networks from pyridyl-substituted tetraarylethylenes and diiodotetrafluorobenzenes
Source: Royal Society of Chemistry journal article supplement (doi:10.1039/c3ce26732f), 2013-01-01

## Electronic Supporting Information for

### *Halogen bonded networks from pyridyl-substituted tetraarylethylenes and diiodotetrafluorobenzenes*

F. Christopher Pigge, Pradeep P. Kapadia and Dale C. Swenson

#### Table of Contents

|                                                                                                                                               |       |
|-----------------------------------------------------------------------------------------------------------------------------------------------|-------|
| <b>Figure S1.</b> One unique conformation of <b>1</b> in <b>1</b> ·(1,4-DIB) <sub>2</sub> (conformer a).....                                  | S2    |
| <b>Figure S2.</b> A second unique conformation of <b>1</b> in <b>1</b> ·(1,4-DIB) <sub>2</sub> (conformer b).....                             | S3    |
| <b>Figure S3.</b> Halogen bonding interactions in <b>1</b> ·(1,4-DIB) <sub>2</sub> (conformer a).....                                         | S4    |
| <b>Figure S4.</b> Halogen bonding interactions in <b>1</b> ·(1,4-DIB) <sub>2</sub> (conformer b).....                                         | S5    |
| <b>Figure S5.</b> Halogen bonding among orthogonally-oriented molecules of <b>1</b> in <b>1</b> ·(1,4-DIB) <sub>2</sub> .....                 | S6    |
| <b>Figure S6.</b> Molecular conformation of <b>1</b> in <b>1</b> ·(1,2-DIB) <sub>2</sub> .....                                                | S7    |
| <b>Figure S7.</b> Halogen bonding environment surrounding <b>1</b> in <b>1</b> ·(1,2-DIB) <sub>2</sub> .....                                  | S8    |
| <b>Figure S8.</b> Two views of halogen bonding network surrounding 1,2-DIB in <b>1</b> ·(1,2-DIB) <sub>2</sub> .....                          | S9-10 |
| <b>Figure S9.</b> Asymmetric unit in <b>2</b> ·(1,4-DIB).....                                                                                 | S11   |
| <b>Figure S10.</b> Halogen bonding in <b>2</b> ·(1,4-DIB).....                                                                                | S12   |
| <b>Figure S11.</b> Comparison of calculated and observed PXRD patterns for <b>1</b> ·(1,4-DIB) <sub>2</sub> .....                             | S13   |
| <b>Figure S12a.</b> Comparison of calculated and observed PXRD patterns for <b>1</b> ·EtOAc and <b>1</b> ·(1,2-DIB) <sub>2</sub> .....        | S14   |
| <b>Figure S12b.</b> Comparison of merged calculated and observed PXRD patterns for <b>1</b> ·EtOAc and <b>1</b> ·(1,2-DIB) <sub>2</sub> ..... | S15   |
| <b>Figure S13.</b> Comparison of calculated and observed PXRD patterns for <b>2</b> ·(1,4-DIB).....                                           | S16   |
| <b>Figure S14.</b> Microcrystalline sample of <b>1</b> ·(1,4-DIB) <sub>2</sub> under ambient and UV light.....                                | S17   |
| <b>Figure S15.</b> Microcrystalline sample of <b>1</b> ·(1,2-DIB) <sub>2</sub> under ambient and UV light.....                                | S18   |

**Figure S1.** One unique conformation of **1** in **1**·(1,4-DIB)<sub>2</sub> (conformer a).

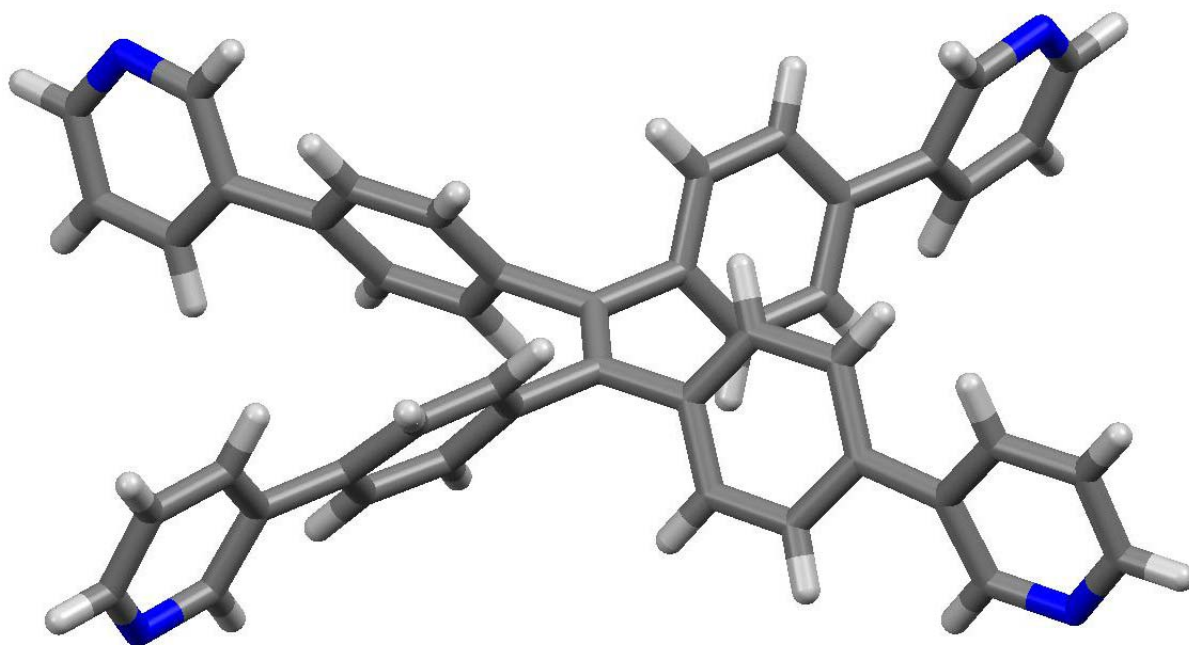

**Figure S2.** A second unique conformation of **1** in **1**·(1,4-DIB)<sub>2</sub> (conformer b).

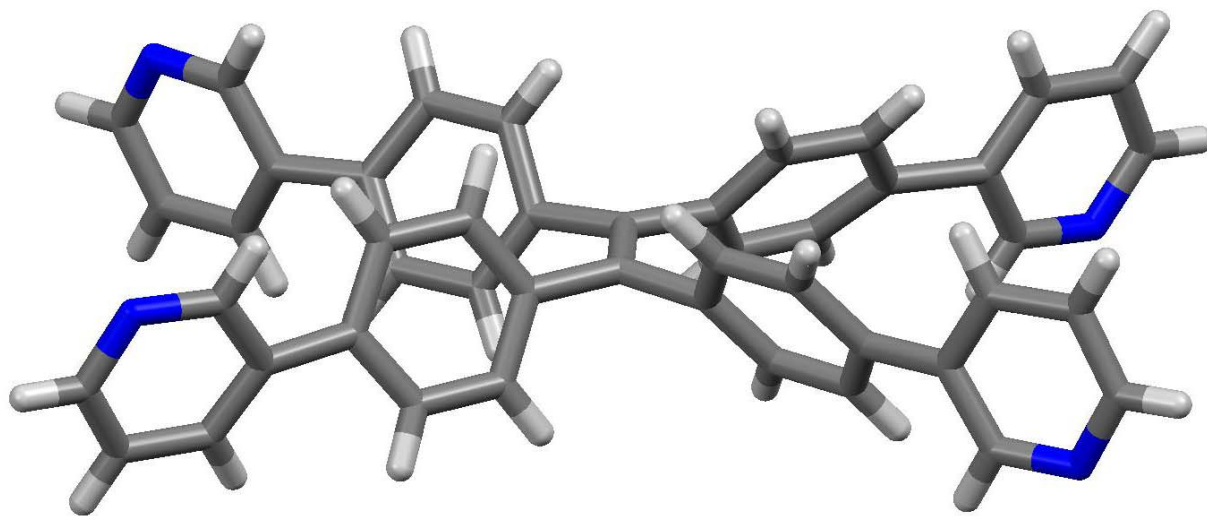

**Figure S3.** Halogen bonding interactions in **1**·(1,4-DIB)<sub>2</sub> (conformer a).

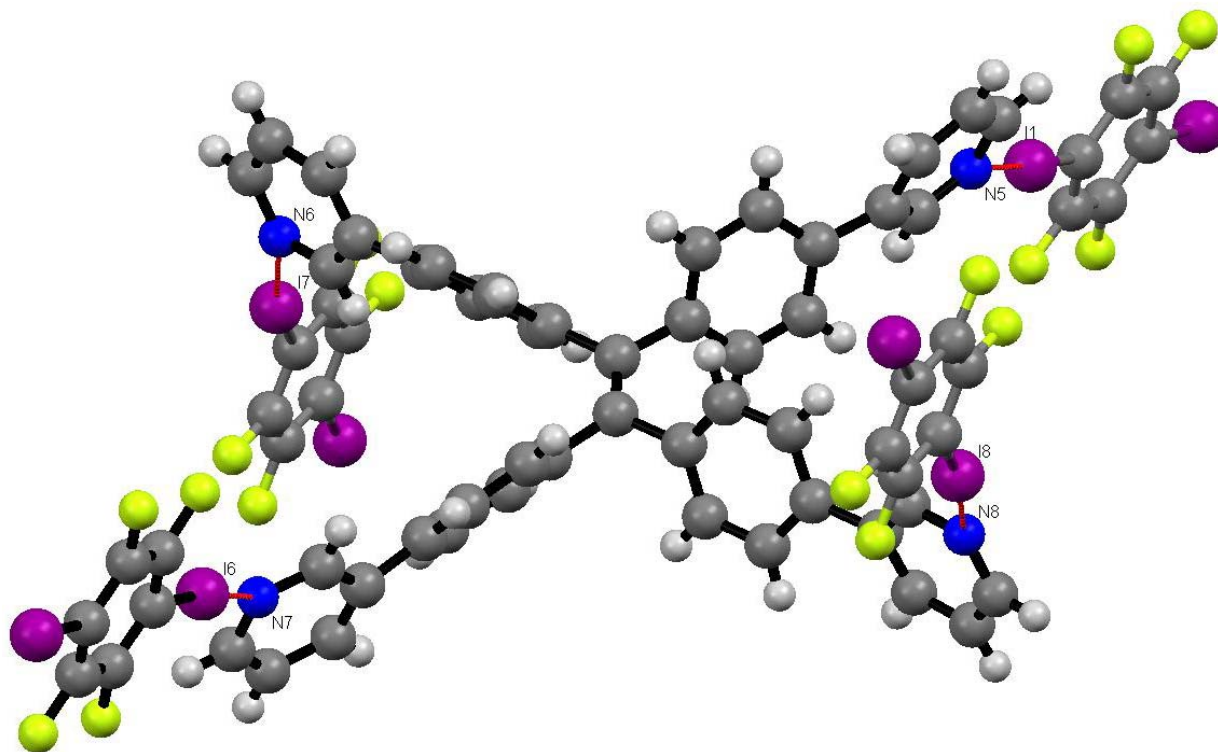

| Bond      | Distance (Å) or angle (°) |
|-----------|---------------------------|
| N5···I1   | 2.796                     |
| N6···I7   | 2.896                     |
| N7···I6   | 2.878                     |
| N8···I8   | 2.884                     |
| C-I1···N5 | 175.91                    |
| C-I7···N6 | 167.85                    |
| C-I6···N7 | 171.50                    |
| C-I8···N8 | 173.05                    |

**Figure S4.** Halogen bonding interactions in **1**·(1,4-DIB)<sub>2</sub> (conformer b).

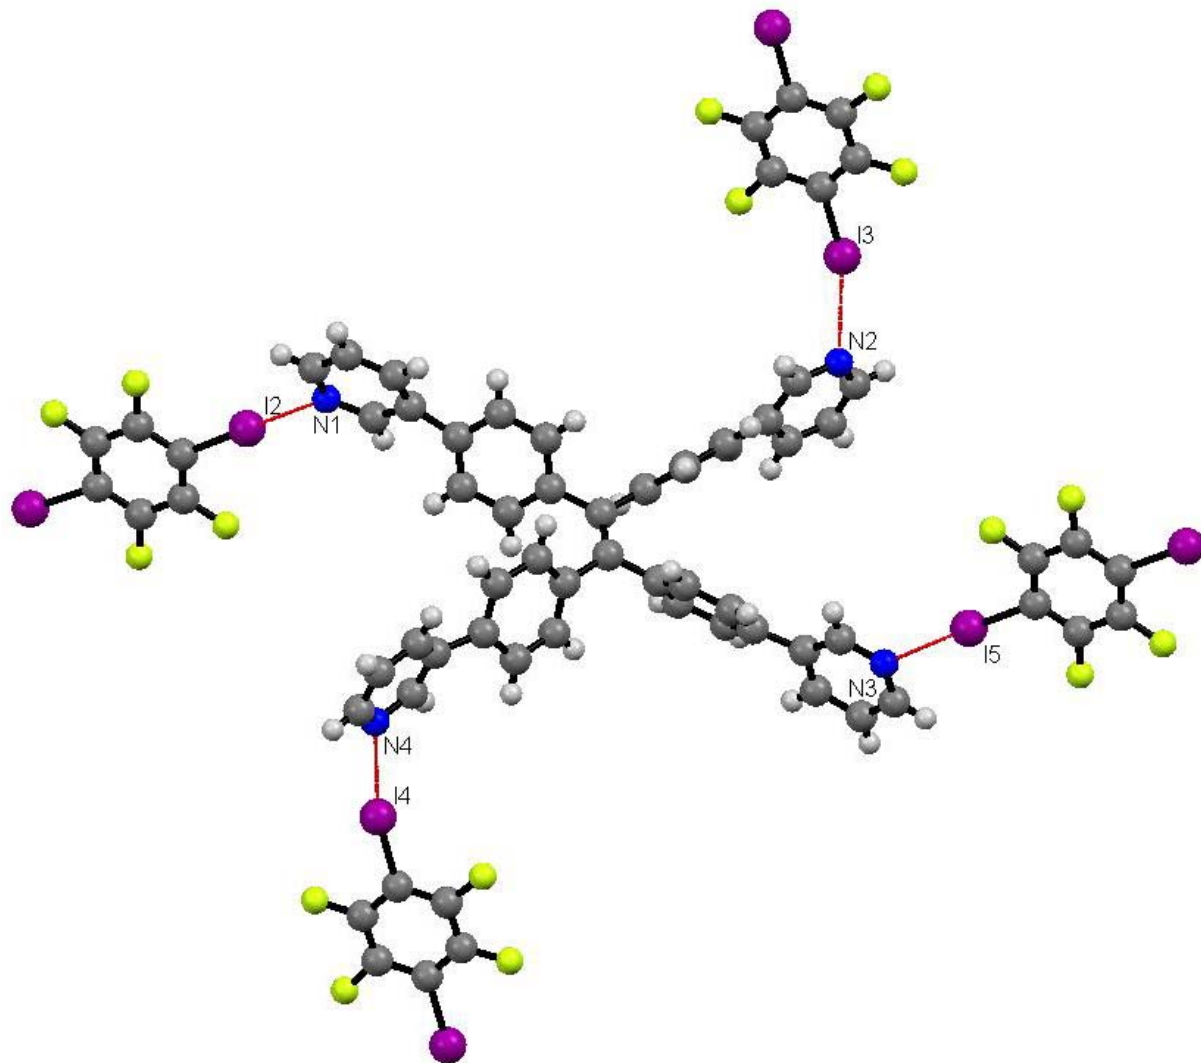

| Bond      | Distance (Å) or angle (°) |
|-----------|---------------------------|
| N1···I2   | 2.768                     |
| N2···I3   | 3.004                     |
| N3···I5   | 2.814                     |
| N4···I4   | 2.849                     |
| C-I2···N1 | 174.31                    |
| C-I3···N2 | 162.39                    |
| C-I5···N3 | 177.43                    |
| C-I4···N4 | 167.60                    |

**Figure S5.** Halogen bonding among orthogonally-oriented molecules of **1** in  $1 \cdot (1,4\text{-DIB})_2$  (down *c*).

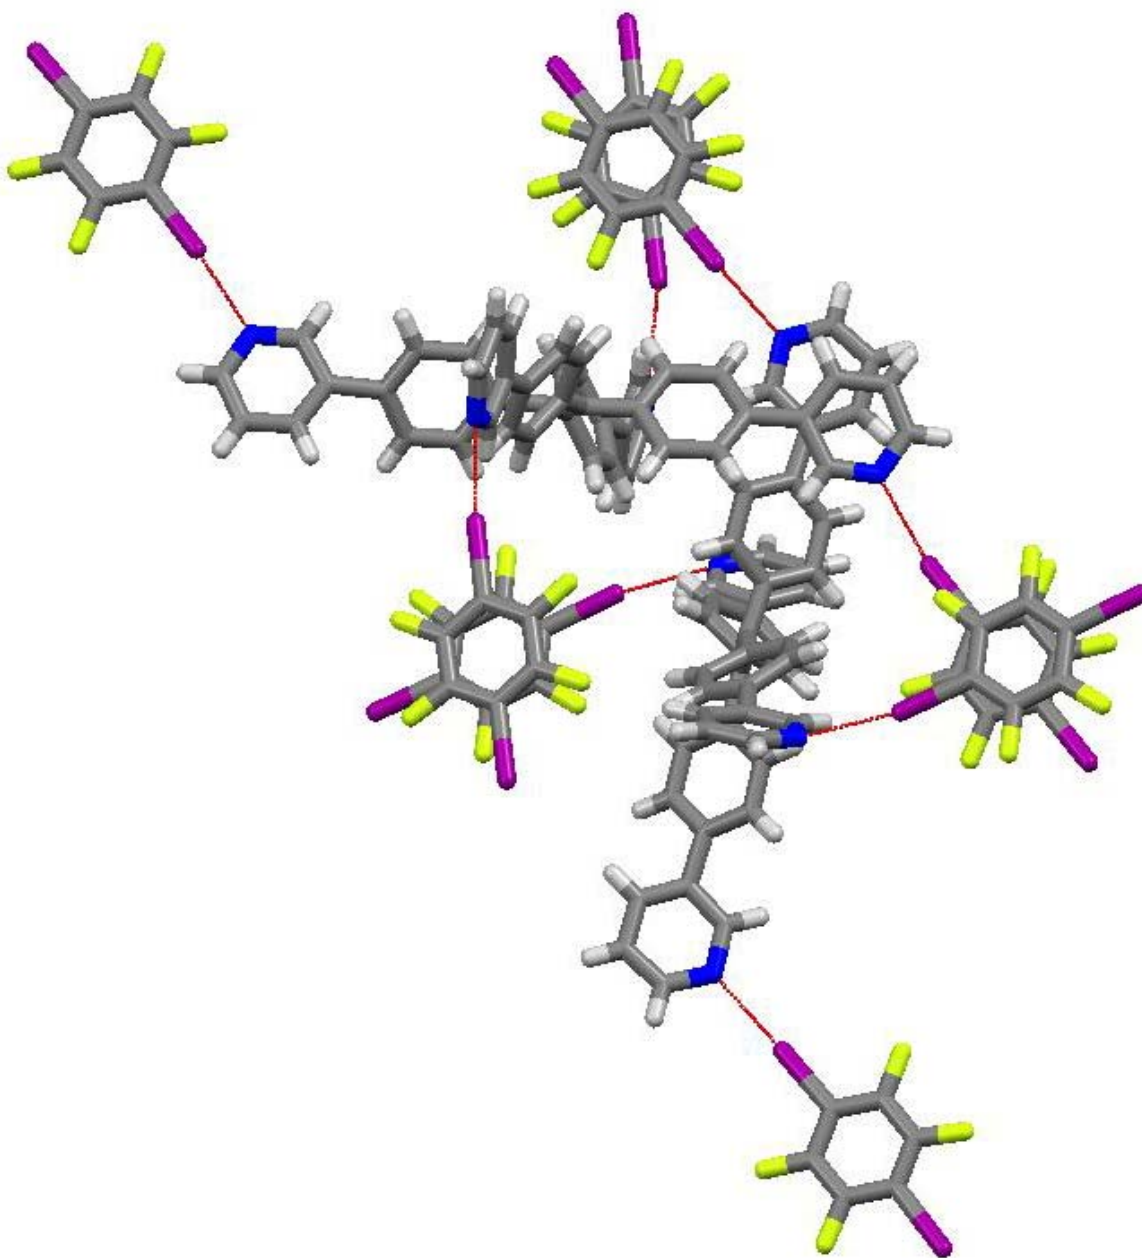

**Figure S6.** Molecular conformation of **1** in  $1 \cdot (1,2\text{-DIB})_2$ .

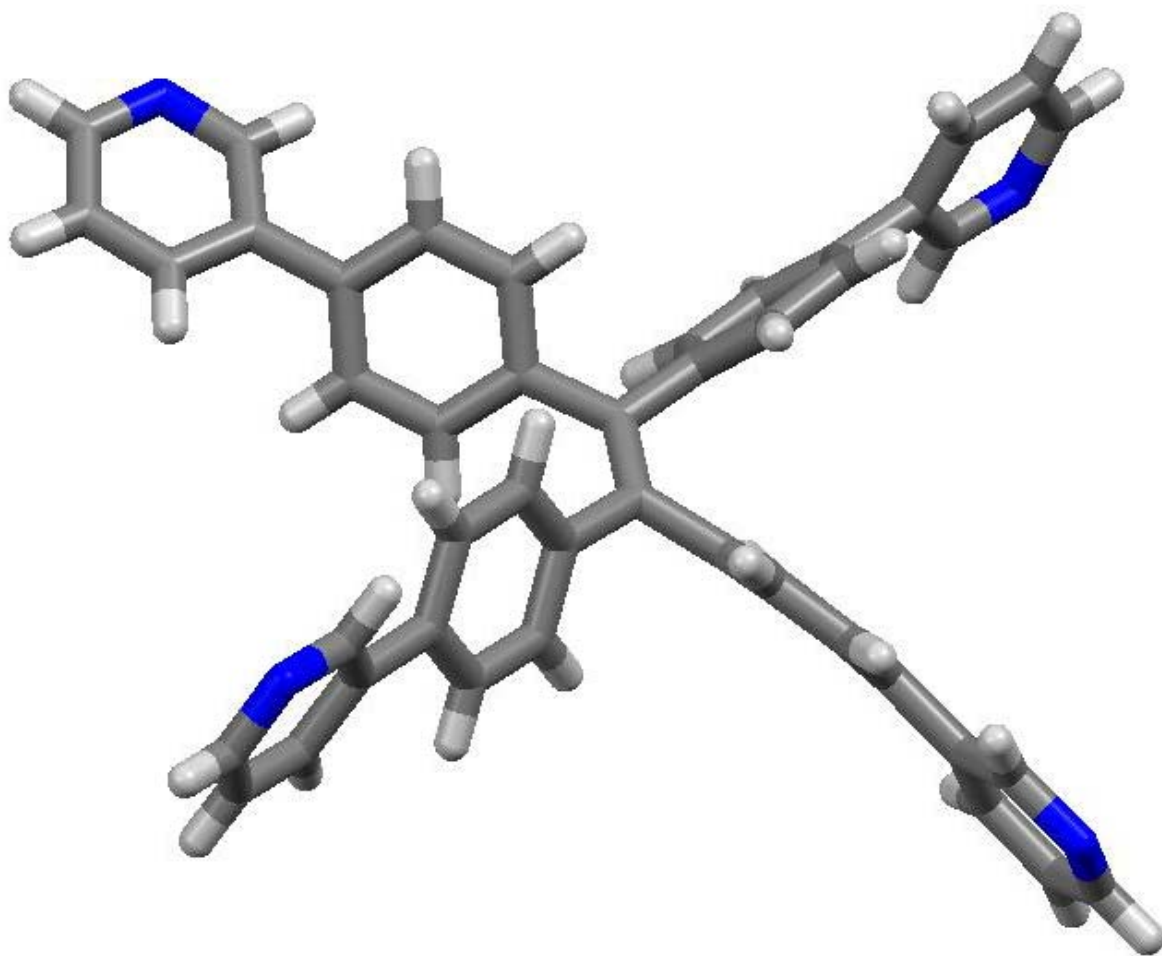

**Figure S7.** Halogen bonding environment surrounding **1** in **1**·(1,2-DIB)<sub>2</sub>.

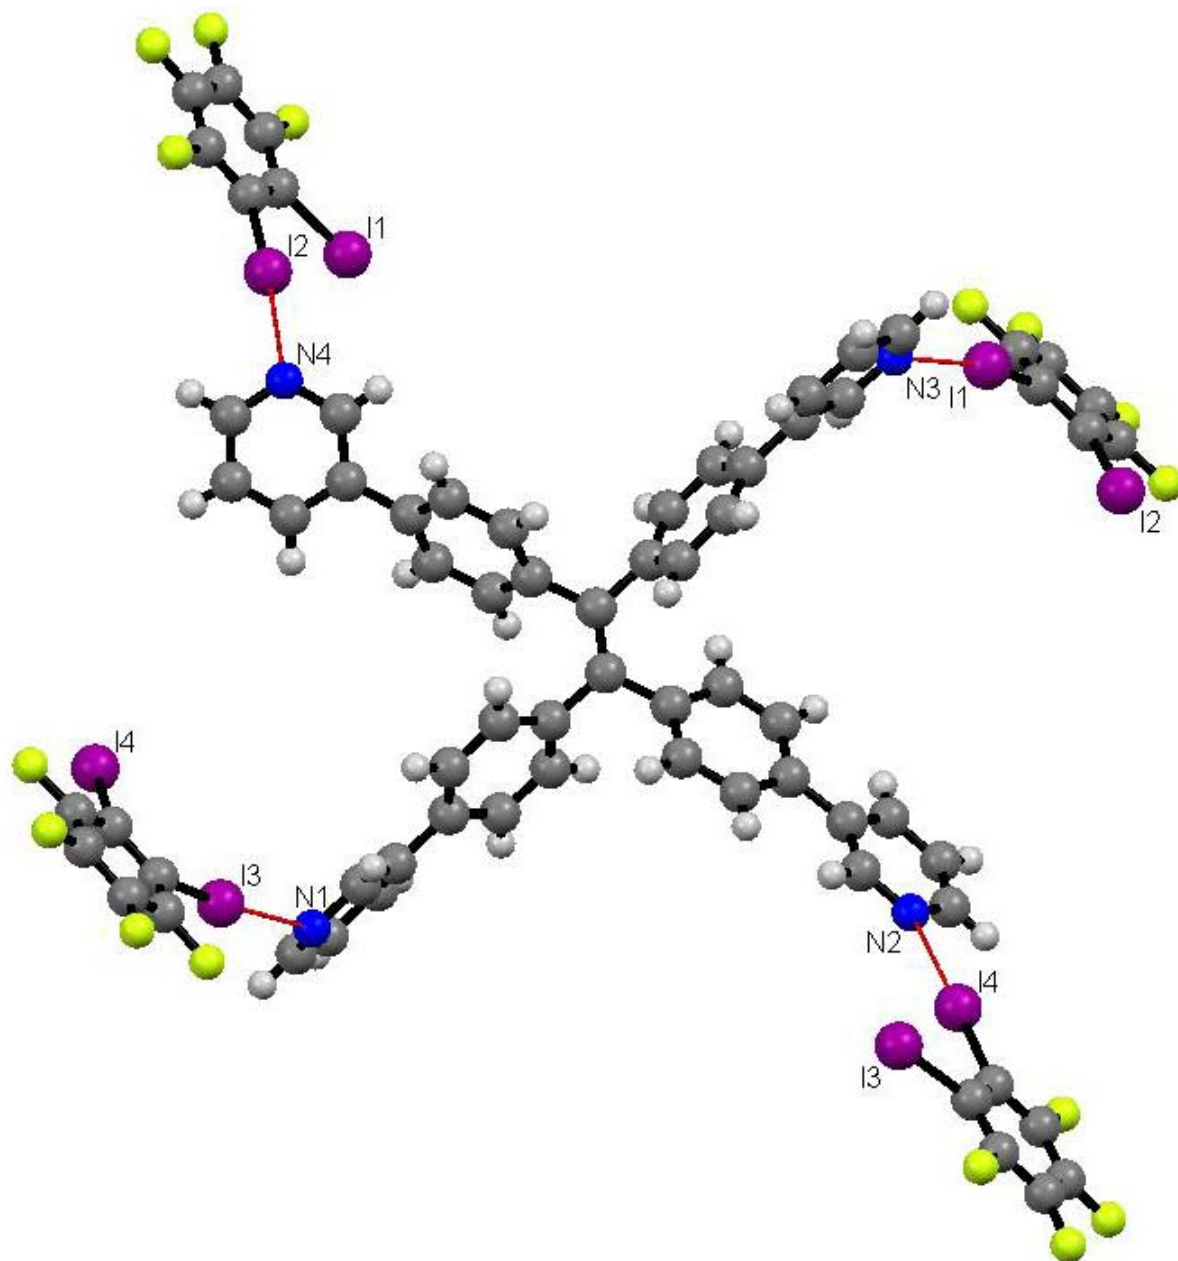

| Bond      | Distance (Å) or angle (°) |
|-----------|---------------------------|
| N1...I3   | 2.913                     |
| N2...I4   | 3.106                     |
| N3...I1   | 2.987                     |
| N4...I2   | 2.935                     |
| C-I3...N1 | 175.24                    |
| C-I4...N2 | 168.20                    |
| C-I1...N3 | 167.94                    |
| C-I2...N4 | 175.76                    |



**Figure S8.** Two views of halogen bonding network surrounding 1,2-DIB in  $1 \cdot (1,2\text{-DIB})_2$ .

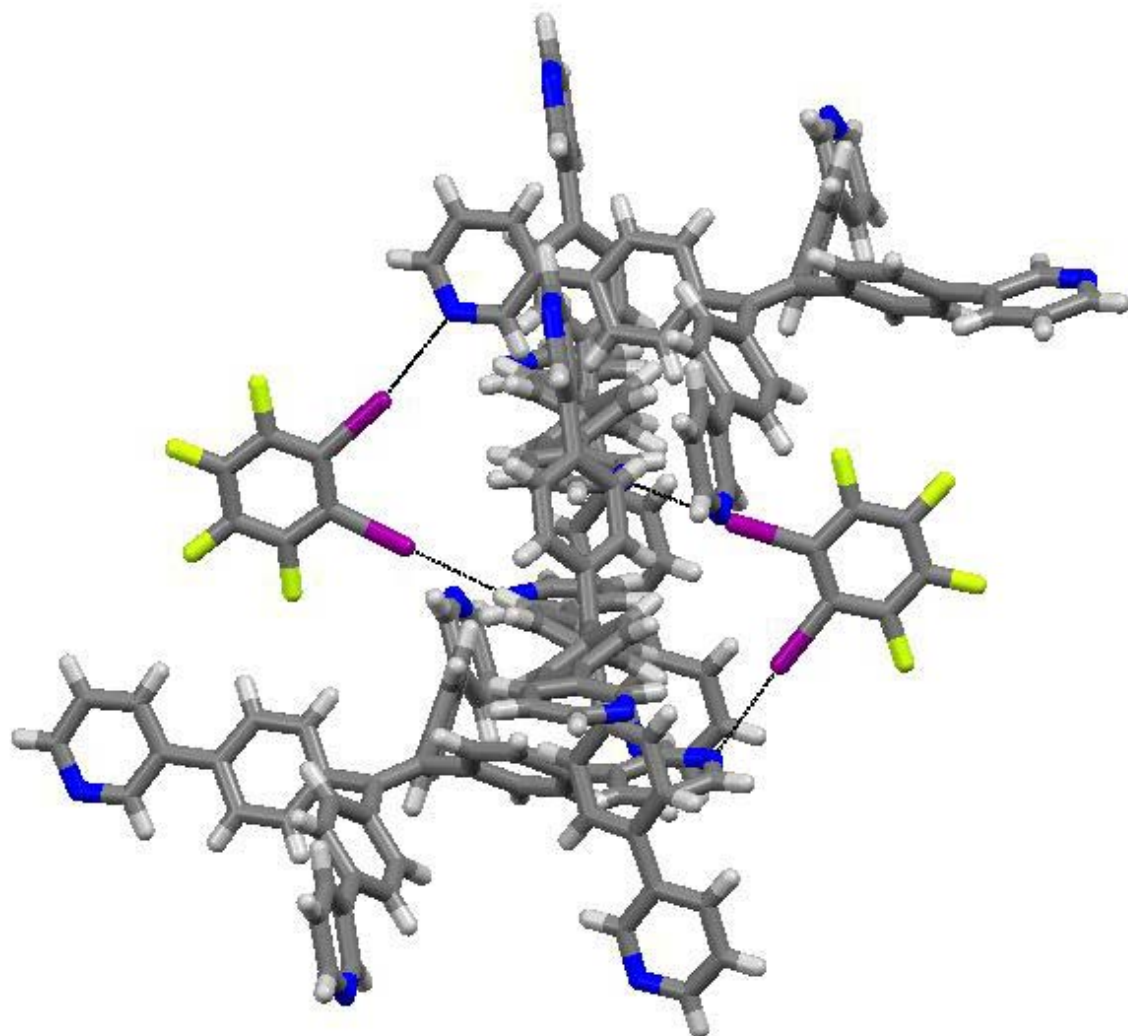

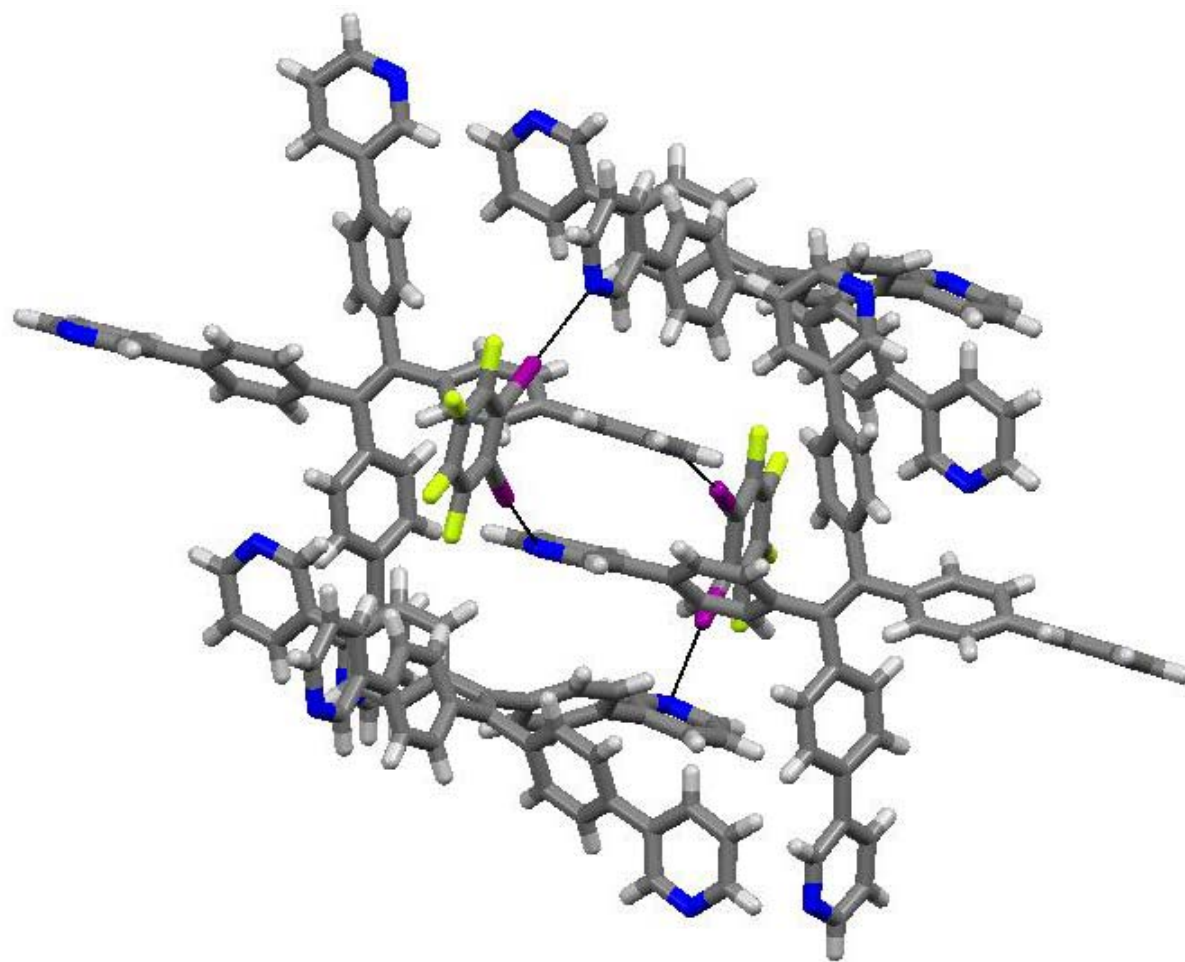

**Figure S9.** Asymmetric unit in **2**·(1,4-DIB).

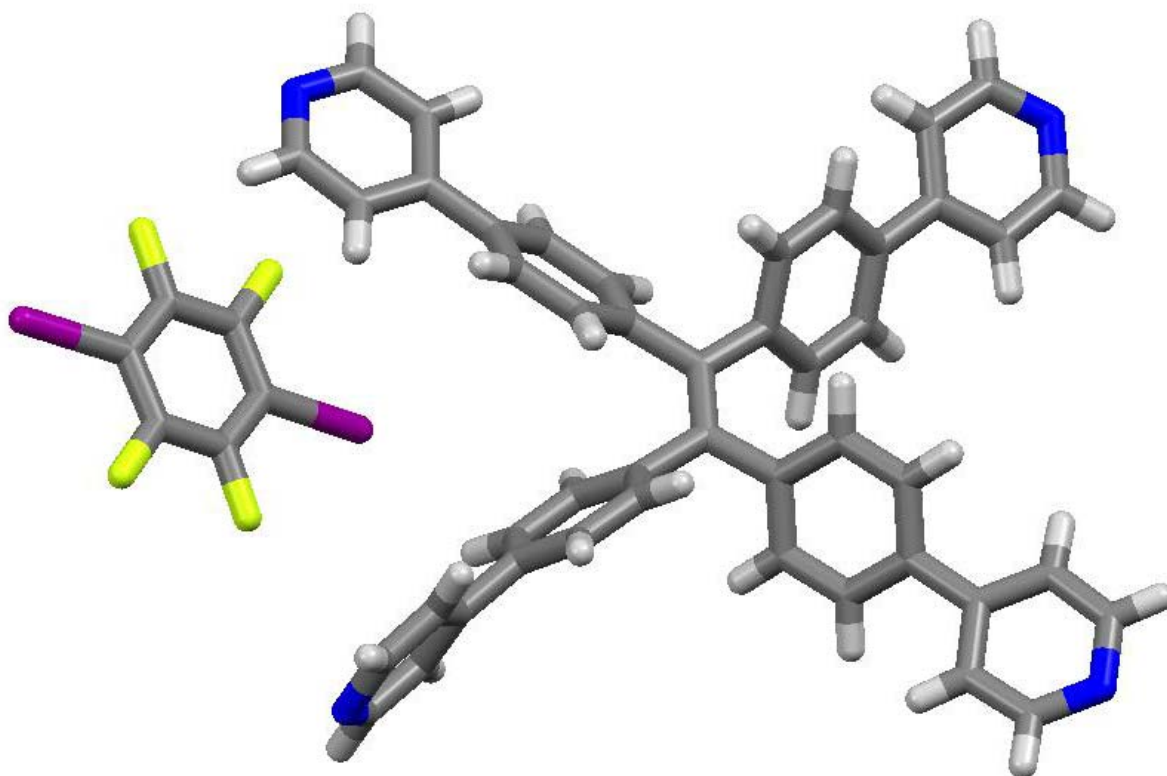

**Figure S10.** Halogen bonding in 2·(1,4-DIB).

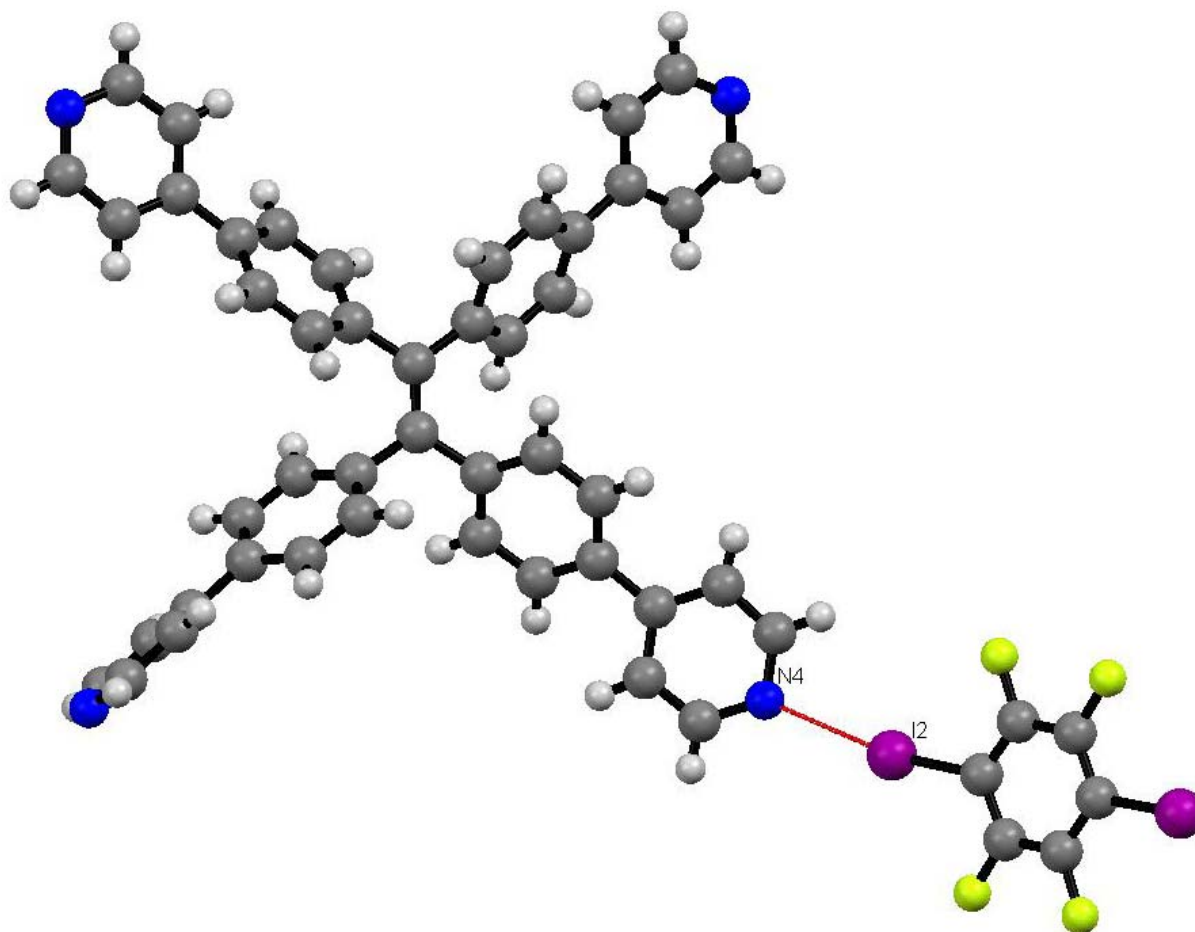

| Bond      | Distance (Å) or angle (°) |
|-----------|---------------------------|
| N4...I2   | 2.917                     |
| C-I2...N4 | 166.15                    |

**Figure S11.** Comparison of calculated (red trace) and observed (black trace) PXRD patterns for  $1 \cdot (1,4\text{-DIB})_2$ .

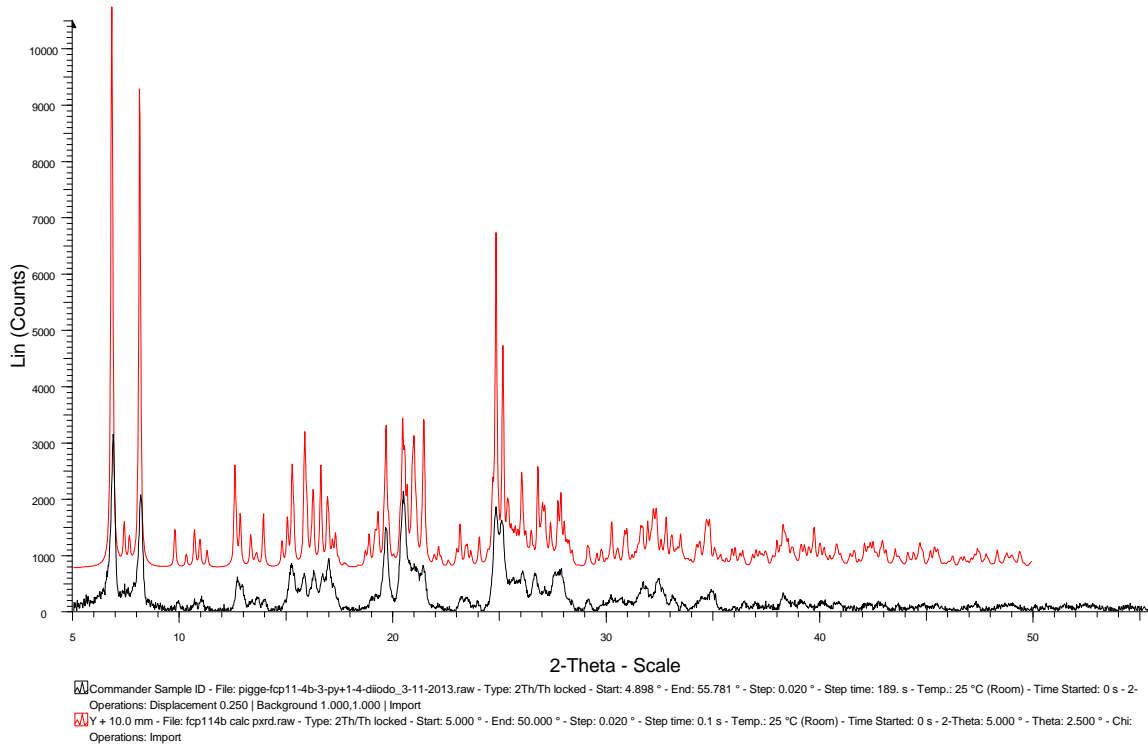

**Figure S12a.** Comparison of calculated powder patterns of **1** (as an EtOAc solvate, red trace)<sup>1</sup> and **1**·(1,2-DIB) (blue trace) with observed (black trace) PXRD pattern for **1**·(1,2-DIB)<sub>2</sub>.

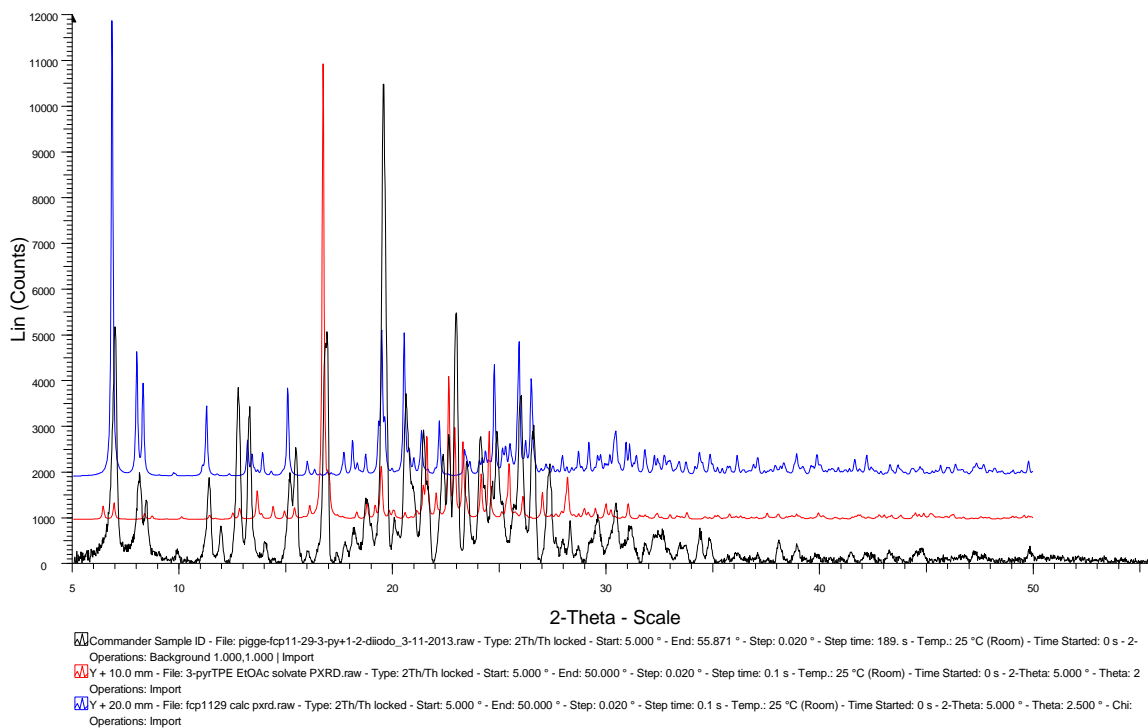

<sup>1</sup>Kapadia, P. P.; Widen, J. C.; Magnus, M. A.; Swenson, D. C.; Pigge, F. C. *Tetrahedron Lett.* **2011**, *52*, 2519-2522.

**Figure S12b.** Comparison of merged calculated PXRD patterns for **1**·EtOAc and **1**·(1,2-DIB)<sub>2</sub> (red trace) with observed PXRD pattern for **1**·(1,2-DIB)<sub>2</sub> (black trace).

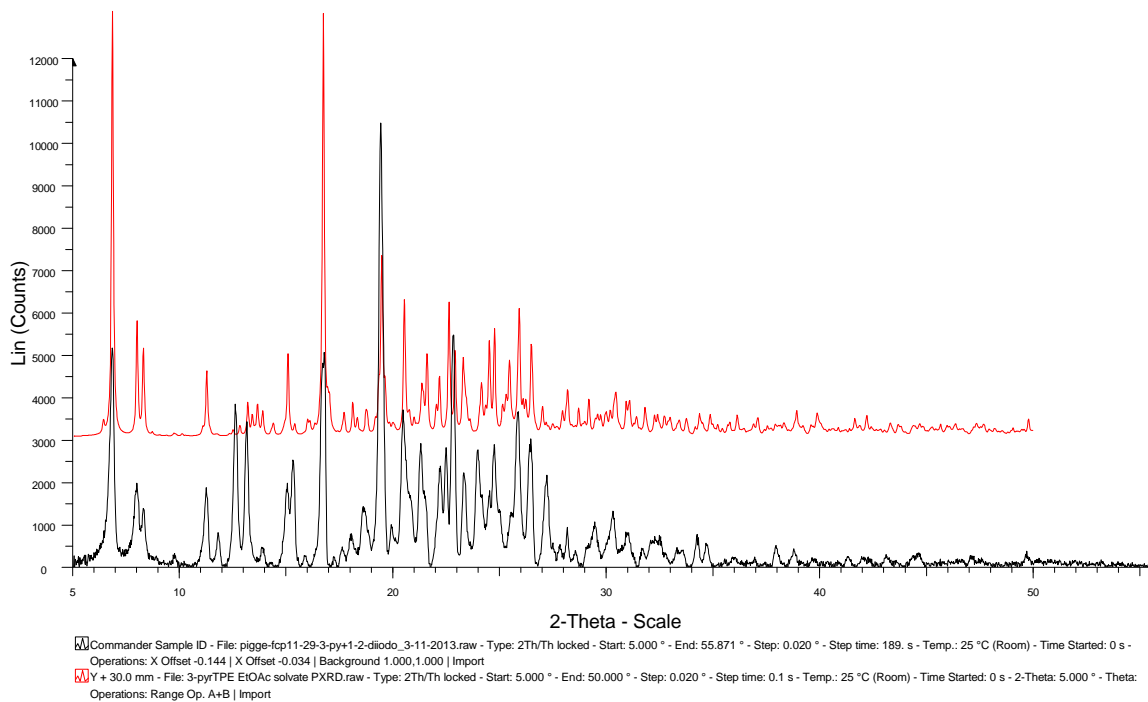

**Figure S13.** Comparison of calculated (red trace) and observed (black trace) PXRD patterns for 2·(1,4-DIB).

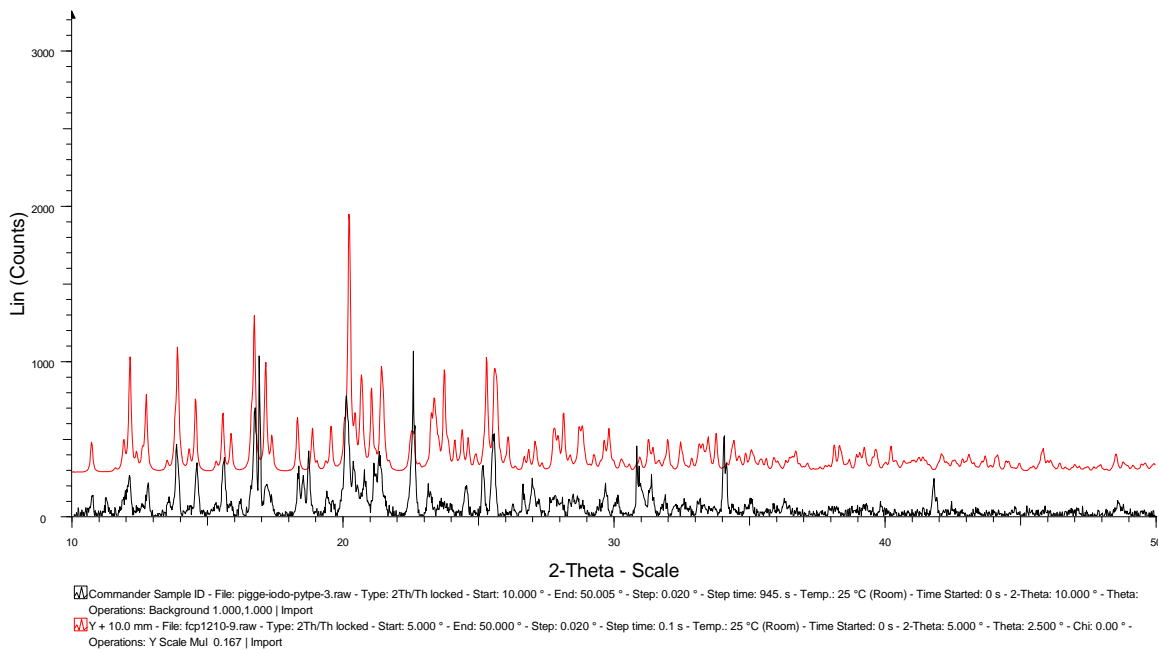



**Figure S14.** Appearance of  $1 \cdot (1,4\text{-DIB})_2$  under ambient light and under irradiation by 366 nm UV light.

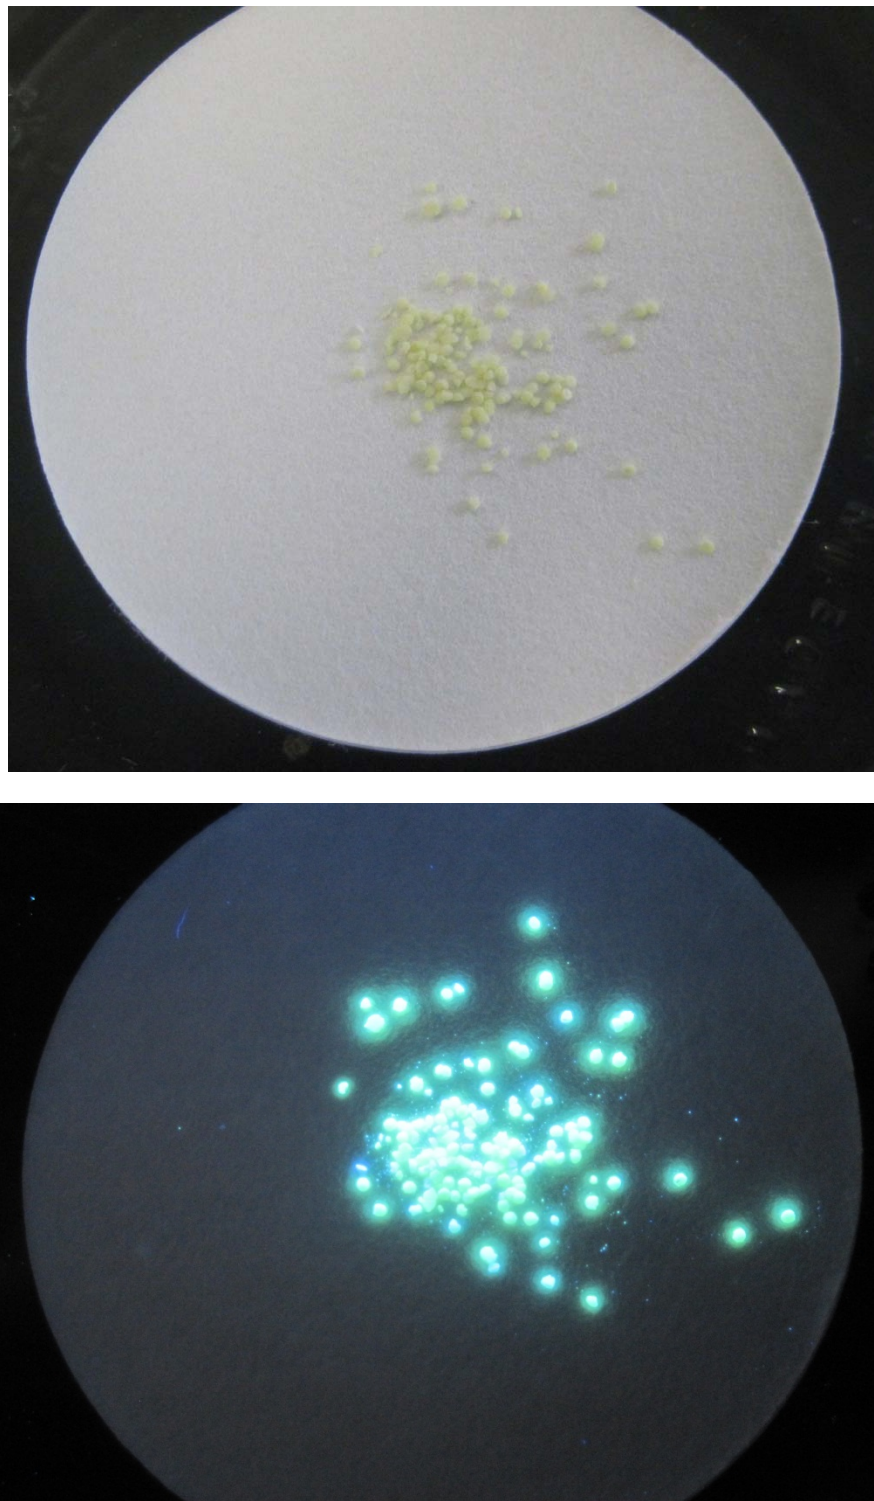

**Figure S15.** Appearance of  $1 \cdot (1,2\text{-DIB})_2$  under ambient light and under irradiation by 366 nm UV light.

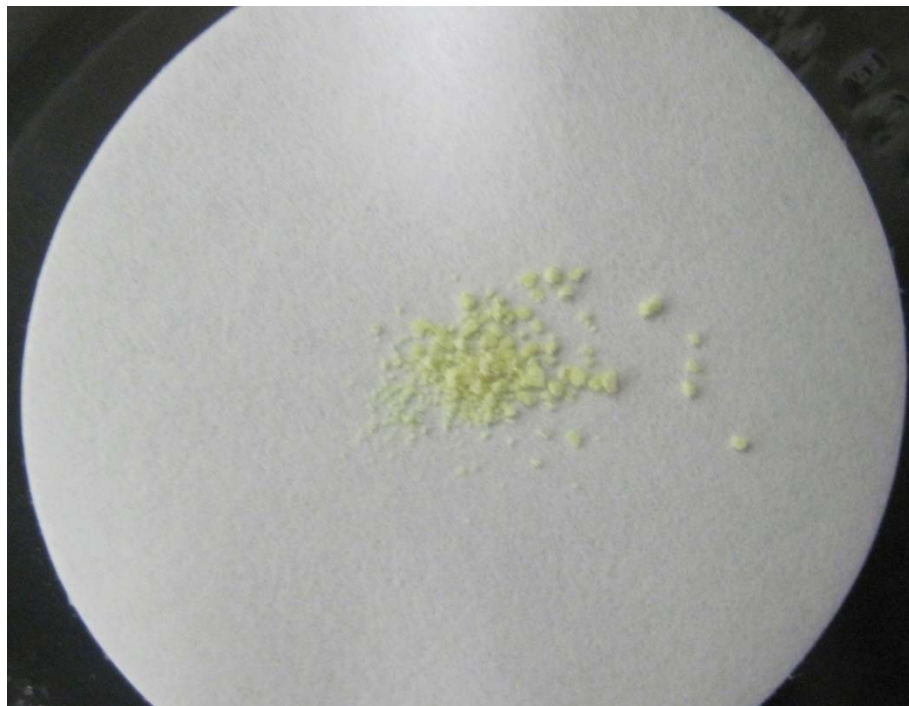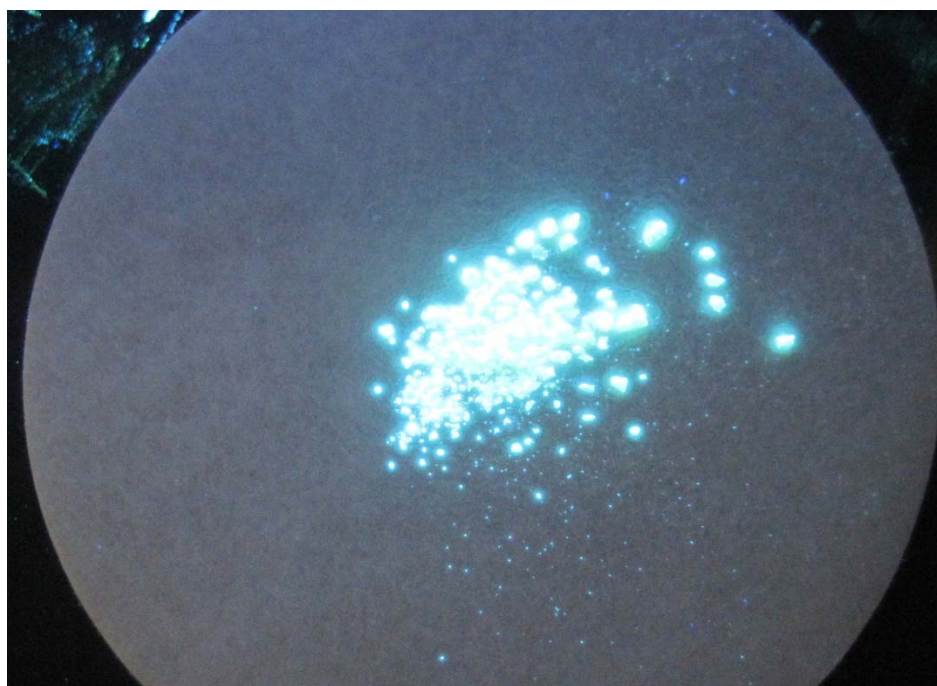

Supplement: c3ce26732f.pdf [file c3ce26732f.pdf]
